# Supplementary material for: The cancer glycocalyx mediates intravascular adhesion and extravasation during metastatic dissemination
Source: PubMed Central journal article supplement (PMC7910477; doi:10.1038/s42003-021-01774-2), 2021-02-26
Supplement: 42003_2021_1774_MOESM3_ESM.pdf [file 42003_2021_1774_MOESM3_ESM.pdf]

## **Description of Additional Supplementary Files**

**File name:** Supplementary Video 1.

**Description:** Real time imaging of TCs (red, RFP) flowing through the MVNs (green, GFP) under a 400 Pa pressure differential. The scale bar is 150  $\mu\text{m}$ .

**File name:** Supplementary Video 2.

**Description:** Time-course imaging of arrested TCs (red) migrating within, and extravasating from the MVNs (green). The time between frames is 30 min.

**File name:** Supplementary Video 3.

**Description:** Time-course imaging of CD44 (white)-mediated extravasation of a TC from MVNs (green). The frame time is 30 min. CD44 focal points mediate adhesion to the endothelium and binding to the sub-endothelial ECM.

**File name:** Supplementary Video 4.

**Description:** Time-course imaging

**File name:** Supplementary Data 1.

**Description:** Data underlying manuscript figures.
